# Supplementary material for: A quantitative atlas of Even-skipped and Hunchback expression in Clogmia albipunctata (Diptera: Psychodidae) blastoderm embryos
Source: PubMed Central journal article supplement (PMC3897886; doi:10.1186/2041-9139-5-1), 2014-01-07
Supplement: 2041-9139-5-1-S1.pdf [file 2041-9139-5-1-S1.pdf]

**Table S1. Polyclonal antisera against *C. albipunctata* Segmentation Proteins.**

This table summarises the polyclonal antisera we have raised for this study. 'Protein' indicates the *C. albipunctata* gene products against which antibodies were raised. Gene nomenclature as in García-Solache *et al.*, 2010; Dev Biol 344: 308–18. 'Species' indicates which animal was used for the immunisation protocol. 'Serum' identifies distinct immunisation reactions (two injections into different animals per gene product). 'Rating': '+++′ indicates minimal background and clear signal; '++′ indicates that higher concentrations of antibody are needed and background is significant; '+' indicates a recognisable staining pattern, but low signal-to-noise ratio. Rating scheme equivalent to that used in Kosman *et al.*, 1998; Dev Genes Evol 208: 290–4.

| Protein | Species    | Serum  | Rating |
|---------|------------|--------|--------|
| Hb      | rabbit     | SK4433 | +++    |
|         |            | SK4434 | +++    |
| Gt      | guinea pig | SKC037 | +++    |
|         |            | SKC038 | +      |
| Kn1     | guinea pig | SKC039 | ++     |
|         |            | SK040  | +      |
| Eve1    | guinea pig | SKC043 | +      |
|         |            | SKC044 | ++     |
