# Supplementary material for: A quantitative atlas of Even-skipped and Hunchback expression in Clogmia albipunctata (Diptera: Psychodidae) blastoderm embryos
Source: PubMed Central journal article supplement (PMC3897886; doi:10.1186/2041-9139-5-1), 2014-01-07
Supplement: 2041-9139-5-1-S2.pdf [file 2041-9139-5-1-S2.pdf]

**Table S2. Number of embryo expression profiles used for data quantification, per gene and time class.**

|            | <b>C13</b> | <b>T1</b> | <b>T2</b> | <b>T3</b> | <b>T4</b> | <b>T5</b> | <b>T6</b> | <b>T7</b> | <b>T8</b> | <b>Total</b> |
|------------|------------|-----------|-----------|-----------|-----------|-----------|-----------|-----------|-----------|--------------|
| <b>Eve</b> | 45         | 45        | 15        | 50        | 22        | 23        | 24        | 42        | 29        | 295          |
| <b>Hb</b>  | 31         | 34        | 15        | 38        | 11        | 14        | 17        | 32        | 17        | 209          |
