# Supplementary material for: A quantitative atlas of Even-skipped and Hunchback expression in Clogmia albipunctata (Diptera: Psychodidae) blastoderm embryos
Source: PubMed Central journal article supplement (PMC3897886; doi:10.1186/2041-9139-5-1), 2014-01-07
Supplement: 2041-9139-5-1-S3.pdf [file 2041-9139-5-1-S3.pdf]

**Table S3. Number of embryos per time class according to physiological age.**

This table plots the number of embryos per assigned time class (C10–C13, C14A: T1–T8) versus the time of fixation (in hr:min after egg activation). See Materials and Methods in the main text for details on egg activation, embryo fixation, and assignment of embryos to time classes.

|              | C10 | C11 | C12 | C13 | T1 | T2 | T3 | T4 | T5 | T6 | T7 | T8 | TOTAL |
|--------------|-----|-----|-----|-----|----|----|----|----|----|----|----|----|-------|
| 3:15         | 11  | 1   |     |     |    |    |    |    |    |    |    |    | 12    |
| 3:30         |     | 10  |     |     |    |    |    |    |    |    |    |    | 10    |
| 4:00         |     |     | 17  |     |    |    |    |    |    |    |    |    | 17    |
| 4:30         |     |     |     | 29  |    |    |    |    |    |    |    |    | 29    |
| 4:45         |     |     |     | 4   |    |    |    |    |    |    |    |    | 4     |
| 5:30         |     |     |     | 5   |    |    |    |    |    |    |    |    | 5     |
| 5:40         |     |     |     | 4   | 21 | 5  |    |    |    |    |    |    | 30    |
| 6:00         |     |     |     | 4   | 11 | 1  |    |    |    |    |    |    | 16    |
| 6:30         |     |     |     |     | 4  |    |    |    |    |    |    |    | 4     |
| 6:45         |     |     |     |     | 1  | 12 | 22 | 1  |    |    |    |    | 36    |
| 7:00         |     |     |     |     |    | 2  | 17 | 18 | 4  |    | 1  |    | 42    |
| 7:30         |     |     |     |     |    |    | 13 | 12 | 13 | 25 | 24 | 5  | 92    |
| 7:45         |     |     |     |     |    |    |    |    | 9  | 8  | 12 | 15 | 44    |
| 8:00         |     |     |     |     |    |    |    |    |    | 2  | 8  | 23 | 33    |
| <b>Total</b> | 11  | 11  | 17  | 46  | 37 | 20 | 52 | 31 | 26 | 35 | 45 | 43 | 374   |
