# Supplementary material for: A quantitative atlas of Even-skipped and Hunchback expression in Clogmia albipunctata (Diptera: Psychodidae) blastoderm embryos
Source: PubMed Central journal article supplement (PMC3897886; doi:10.1186/2041-9139-5-1), 2014-01-07
Supplement: 2041-9139-5-1-S5.pdf [file 2041-9139-5-1-S5.pdf]

**Table S5. Width of the Eve domain in *C. albipunctata* and *D. melanogaster* embryos.**

Data shown for time classes T5–T8. Total domain widths (in % egg length) are calculated—from integrated data—as reaching from the peak of Eve stripe 1 to the peak of Eve stripe 6 (*C. albipunctata*) or stripe 7 (*D. melanogaster*). See Materials and Methods in the main text for details.

|                        | T5    |       | T6    |       | T7    |       | T8    |       |
|------------------------|-------|-------|-------|-------|-------|-------|-------|-------|
|                        | Width | STDEV | Width | STDEV | Width | STDEV | Width | STDEV |
| <i>C. albipunctata</i> | 54.40 | 1.26  | 56.17 | 2.99  | 54.59 | 2.96  | 54.80 | 4.44  |
| <i>D. melanogaster</i> | 51.10 | 6.48  | 50.28 | 6.70  | 48.57 | 4.98  | 47.43 | 4.63  |
